# Supplementary material for: Recent Changes in Land Water Storage and its Contribution to Sea Level Variations
Source: Surv Geophys. 2016 Nov 15;38(1):131–52. doi: 10.1007/s10712-016-9399-6 (PMC7115037; doi:10.1007/s10712-016-9399-6)
Supplement: Supplementary file 1 — Supplementary material 1 (XLSX 26 kb) [file 10712_2016_9399_MOESM1_ESM.xlsx]

## Sheet: suppplement
number=			sum=		na: not available
144			4331.17	km3	WGS8
Continent	Country	Reservoir	Capacity (km3)	Year of completion	latitude	longtitude
AFRICA	Zimbabwe;Zambia	KARIBA	180.6	1959	-16.5232	28.7615
ASIA	Russia (Russian Fed.)	BRATSK	169	1964	56.2861	101.786
AFRICA	Egypt	HIGH ASWAN DAM	162	1970	23.9706	32.8778
AFRICA	Ghana	LAKE VOLTA	150	1965	6.29972	0.059444
AMERICA N.	Canada	MANICOUAGAN	141.851	1968	50.6467	-68.7244
AMERICA S.	Venezuela	GURI	135	1986	7.76444	-63
AMERICA N.	Canada	BENNETT W.A.C.	74.3	1967	56.0167	-122.201
ASIA	Russia (Russian Fed.)	KRASNOYARSK	73.3	1967	55.9347	92.2936
ASIA	Russia (Russian Fed.)	ZEYA	68.4	1978	53.7692	127.306
ASIA	Iraq	Badi Tartar	67	1956	na	na
AMERICA N.	Canada	LA GRANDE - 2	62.6619	1979	53.7794	-77.5483
AMERICA N.	Canada	LA GRANDE-3	60.02	1981	53.7297	-75.9683
ASIA	Russia (Russian Fed.)	UST-ILIM	59.3	1977	57.9678	102.694
AMERICA N.	Canada	CUTARM CREEK	58.596	1966	50.5167	-101.668
ASIA	Russia (Russian Fed.)	BOGUCHANY	58.2	2012	58.6947	99.1489
EUROPE	Russia (Russian Fed.)	KUIBYSHEV	58	1955	53.7772	48.9294
AMERICA S.	Brazil	SERRA DA MESA	54.4	1998	-13.8342	-48.3044
AMERICA N.	Canada	CANIAPISCAU	53.79	1981	54.1575	-69.8456
AFRICA	Mozambique	CAHORA BASSA	52	1974	-15.5858	32.7047
AMERICA S.	Chile	Dantsianhow	15.6	1962	na	na
ASIA	India	Upper Wainganga	50.7	1981	22.3753	79.6643
ASIA	Kazakhstan	BUKHTARMA	49.8	1960	49.6611	83.3478
EUROPE	Turkey	ATATURK	48.7	1992	37.4817	38.3217
ASIA	Russia (Russian Fed.)	IRKUTSK	46	1955	52.2428	104.329
AMERICA S.	Brazil	TUCURUI	45.5	1984	-3.83167	-49.6467
EUROPE	Russia (Russian Fed.)	Lower Kama	45	1987	55.6994	52.2783
ASIA	Malaysia	BAKUN DAM	43.8	2011	2.75639	114.063
AMERICA S.	Argentina	Cerros Colorados	43.5	1980	-38.5	-68.8333
ASIA	Iraq	Thartar	43.5	1956	33.7531	43.5267
ASIA	China	Sanxia	39.3	2010	30.83	111.01
AMERICA N.	United States of America	HOOVER	37.2968	1936	36.0156	-114.738
AMERICA N.	Canada	Winar Grue	37	1952	na	na
ASIA	Russia (Russian Fed.)	VILYUI	35.9	1967	63.0319	112.472
AMERICA N.	United States of America	GLEN CANYON	35.5502	1964	36.9375	-111.484
AMERICA S.	Brazil	SOBRADINHO	34.116	1979	-9.43167	-40.8278
ASIA	China	Danjiangkou	33.91	2013	32.5561	111.488
AMERICA N.	Canada	JENPEG	31.79	1975	54.5433	-98.0267
EUROPE	Russia (Russian Fed.)	VOLGOGRAD	31.5	1958	48.8287	44.6796
ASIA	Russia (Russian Fed.)	SAYANO -SHUSHENSKAYA	31.3	1990	52.825	91.3709
EUROPE	Turkey	KEBAN	31	1974	38.8069	38.7569
AMERICA N.	United States of America	GARRISON DAM	30.2203	1953	47.4986	-101.412
EUROPE	Finland	TAINIONKOSKI	30	1949	61.2105	28.7835
AMERICA N.	Canada	IROQUOIS CONTROL	29.959	1958	44.8361	-75.3083
ASIA	China	Longtan	29.92	2009	25.0272	107.047
AMERICA N.	United States of America	OAHE DAM	29.1102	1966	44.4519	-100.399
AMERICA S.	Paraguay and Brazil	ITAIPU	29	1991	-25.4081	-54.5889
AMERICA N.	Canada	Smallwood Reservoir	28.97	1974	54.1	-64.4167
AMERICA N.	Canada	MISSI FALLS CONTROL	28.3705	1976	57.3231	-98.1362
ASIA	Kazakhstan	KAPCHAGAY	28.1	1970	43.8667	77.5
AFRICA	Ivory Coast	KOSSOU	27.6754	1972	7.03127	-5.4731
ASIA	China	Longyangxia	27.63	1989	36.1222	100.918
AMERICA N.	Canada	Ear Falls Dam	26.3551	1929	50.6388	-93.2004
ASIA	Iraq	Razza Dyke	26	1970	32.6983	43.8944
EUROPE	Russia (Russian Fed.)	RYBINSK	25.4	1941	58.3667	38.4333
AMERICA S.	Brazil	LIMOEIRO	25.16	1958	-21.6221	-47.0121
AMERICA N.	Canada	MICA	25	1972	52.0778	-118.566
AMERICA N.	Canada	OUTARDES-4	24.352	1969	49.7056	-68.9058
EUROPE	Turkey	GÖLKÖY	24.073	1970	40.7018	31.525
EUROPE	Russia (Russian Fed.)	VAN BLOMMENSTEIN	24	1952	47.6121	42.1088
AMERICA S.	Suriname	TSIMLIANSK	24	1965	4.8	-55.0667
AMERICA N.	Canada	KENNEY	23.8	1952	53.5792	-124.95
ASIA	China	Nuozhadu	23.703	2012	22.6561	100.418
AMERICA N.	United States of America	FORT PECK DAM	23.5595	1957	48.0028	-106.416
ASIA	Russia (Russian Fed.)	UST-KHANTAIKA	23.5	1970	68.1621	87.8129
ASIA	China	Shuikou	23.4	1980	26.3031	118.812
AMERICA S.	Brazil	PLANALTO	22.95	2009	na	na
AMERICA S.	Brazil	FURNAS	22.95	1963	-20.6697	-46.3181
ASIA	China	Xin'anjiang	21.626	1965	29.4836	119.213
AMERICA S.	Brazil	ILHA SOLTEIRA	21.166	1973	-20.3828	-51.3622
AMERICA S.	Paraguay;Argentina	YACYRETA	21	1994	-27.4827	-56.725
ASIA	Russia (Russian Fed.)	BUREYA	20.9	2009	50.2692	130.313
AMERICA S.	Argentina	RAMOS MEXÍA	20.2	1973	-39.2658	-68.7564
AMERICA S.	Brazil	PORTO PRIMAVERA	20	1986	-22.4753	-52.9583
AMERICA N.	Canada	DENIS-PERRON	19.6075	2001	50.7903	-66.7919
AMERICA N.	Canada	LA GRANDE - 4	19.53	1981	53.8861	-73.4625
AMERICA S.	Brazil	TRES MARIAS	19.528	1962	-18.2142	-45.2628
ASIA	Kyrgyzstan	TOKTOGUL	19.5	1978	41.6571	72.6361
EUROPE	Ukraine	Kakhovskaya	18.2	1955	46.7761	33.3715
AMERICA N.	Canada	WHITESAND RAPIDS	17.9	1942	56.2341	-103.148
ASIA	Thailand	SRINAGARIND	17.745	1978	14.4086	99.1283
AMERICA S.	Brazil	EMBORCAÇÃO	17.588	1982	-18.4469	-47.9864
AMERICA S.	Brazil	BALBINA	17.537	1989	-1.91722	-59.4736
EUROPE	Russia (Russian Fed.)	VERKHNE- SVIRSKAYA	17.5	1952	60.9221	34.1912
AMERICA S.	Brazil	ITUMBIARA	17.027	1980	-18.4078	-49.0983
AMERICA N.	Canada	Gabbro Control Dam	16.0435	1974	53.4487	-64.7662
ASIA	Azerbaijan	MINGECHAUR	16	1953	40.7914	47.025
ASIA	China	Xiaowan	15.043	2012	24.7031	100.092
AMERICA S.	Argentina	KAINJI	15	2002	-32.995	-69.1258
AFRICA	Nigeria	POTRERILLOS	15	1968	9.8625	4.61333
AFRICA	Ethiopia	GILGEL GIBE III	14.69	2014	6.84722	37.3014
ASIA	Korea N. (Dem. People's Rep. of Korea);China	SUPUNG	14.666	1988	40.4619	124.963
EUROPE	Russia (Russian Fed.)	Kolyma	14.6	1982	62.0555	150.408
ASIA	Syria	Tabqa	14	1973	35.8722	38.5667
ASIA	China	Jinshuitan	13.93	1988	28.2125	119.536
AMERICA N.	Canada	PIPMUACAN	13.9	1956	49.6617	-70.2717
ASIA	Pakistan	TARBELA	13.9	1976	35.5167	73.7919
ASIA	China	Xinfengjiang	13.896	1977	23.7264	114.647
AMERICA S.	Brazil	TRÊS IRMÃOS	13.8	1991	-20.6656	-51.3014
EUROPE	Russia (Russian Fed.)	NIZHNE -KAMSKAYA	13.8	2012	55.7037	52.2796
AMERICA N.	United States of America	LOCK & DAM #3	13.6916	1938	44.61	-92.6103
ASIA	Malaysia	KENYIR	13.6	1985	5.02367	102.91
EUROPE	Ukraine	OLEKSANDRIV	13.52	1997	47.703	31.2545
EUROPE	Ukraine	KREMENCHUG	13.52	1960	49.0775	33.2506
ASIA	China	Sanhezha	13.5	1953	33.0911	118.725
ASIA	Thailand	BHUMIBOL	13.462	1964	17.2425	98.9722
EUROPE	Russia (Russian Fed.)	Kuma	13.3	1963	66.3608	31.0914
ASIA	China	Xiluodu	12.914	2013	28.2599	103.65
EUROPE	Russia (Russian Fed.)	SARATOV	12.9	1967	52.0531	47.755
EUROPE	Russia (Russian Fed.)	CHEBOKSARY	12.8	1986	56.1381	47.4656
AMERICA S.	Brazil	NOVA PONTE	12.792	1994	-23.5833	-45.8667
ASIA	China	Xiaolangdi	12.65	2001	34.9246	112.377
AFRICA	Ghana	BUI	12.57	2013	8.27833	-2.23583
AMERICA S.	Brazil	SÃO SIMÃO	12.54	1978	-19.0192	-50.5003
AFRICA	Sudan	MEROWE	12.5	2009	18.6689	32.0503
AMERICA S.	Argentina	PIEDRA DEL AGUILA	12.4	1993	-40.1903	-69.9914
AMERICA N.	Canada	PINE PORTAGE MAIN	12.3626	1950	49.3071	-88.3094
AUSTRAL-ASIA	Australia	LAKE GORDON	12.359	1974	-42.7306	145.976
AMERICA N.	Canada	Des Roches	12.3	1964	48.31	-71.2116
EUROPE	Russia (Russian Fed.)	KAMA	12.2	1954	58.9833	56.1667
ASIA	Malaysia	MURUM	12.043	2015	2.64667	114.366
AMERICA N.	United States of America	GRAND COULEE	11.7946	1942	47.9558	-118.982
AMERICA N.	United States of America	Franklin	11.7	1942	43.4689	-71.659
ASIA	India	NAGARJUNA SAGAR PROJECT	11.561	1974	16.5756	79.3117
EUROPE	Russia (Russian Fed.)	VERKHNE- TULOMSKAYA	11.52	1965	68.6038	31.7587
AFRICA	Mali	MANANTALI	11.27	1987	13.1956	-10.4289
AMERICA N.	United States of America	Imandrovsk	11.2	1953	na	na
ASIA	Iraq	Mosul	11.1	1985	36.6303	42.8231
AMERICA S.	Brazil	ÁGUA VERMELHA	11.025	1978	-19.8653	-50.3467
EUROPE	Russia (Russian Fed.)	ONDA	10.9	1956	63.8921	33.3088
ASIA	China	Fengman	10.8	1953	43.7194	126.689
EUROPE	Russia (Russian Fed.)	KUMSKAYA	10.8	1963	67.4079	32.5504
ASIA	China	LAXIWA	10.79	2010	36.0717	101.187
AMERICA S.	Brazil	ITAPARICA	10.782	1988	-9.14389	-38.3133
AUSTRAL-ASIA	Australia	LAKE ARGYLE	10.76	1972	-16.1889	128.907
ASIA	India	RIHAND	10.6	1962	24.2025	83.0081
AMERICA N.	Mexico	NEZAHUALCÓYOTL	10.596	1964	17.1786	-93.5983
AMERICA S.	Brazil	CAPIVARA	10.54	1977	-22.6601	-51.358
AMERICA N.	United States of America	STRUCTURE 308B & 308	10.508	1977	26.9849	-80.6214
ASIA	Tajikistan	NUREK	10.5	1980	38.3717	69.3481
AMERICA N.	Canada	MANICOUAGAN 3	10.423	1975	49.7405	-68.5931
ASIA	Indonesia	GAPIT	10.36	1997	-8.7944	117.934
AMERICA N.	Canada	KEENLEYSIDE	10.3	1968	49.3394	-117.772
ASIA	China	Tianshengqiao 1	10.257	2000	24.9414	105.107
ASIA	Thailand	MAE TEEB	10	1987	17.8619	98.6544
